# Supplementary material
Source: PubMed Central journal article supplement (PMC7611724)
Supplement: EMS127426-supplement-Supplementary_Information.pdf [file EMS127426-supplement-Supplementary_Information.pdf]

## Supplementary Information

### Supplementary Tables

Supplementary Table 1 – Data collection and refinement statistics

|                                                         | HUWE1 <sub>N</sub> native | HUWE1 <sub>N</sub><br>SeMet | HUWE1 <sub>N</sub> TaBr   |
|---------------------------------------------------------|---------------------------|-----------------------------|---------------------------|
| <b>Data collection</b>                                  |                           |                             |                           |
| Space group                                             | <i>P</i> 1                | <i>P</i> 1                  | <i>P</i> 1                |
| Cell dimensions                                         |                           |                             |                           |
| <i>a</i> , <i>b</i> , <i>c</i> (Å)                      | 95.5, 96.2, 199.7         | 94.4, 95.3, 199.4           | 94.8, 96.2, 201.3         |
| $\alpha$ , $\beta$ , $\gamma$ (°)                       | 92.2, 100.5, 95.3         | 92.7, 100.2, 95.1           | 92.2, 99.6, 94.8          |
| Resolution (Å)                                          | 196-3.05 (3.39-3.05)      | 98.0-3.42 (3.74-<br>3.42)   | 95.8-4.99 (5.22-<br>4.99) |
| <i>R</i> <sub>pim</sub>                                 | 0.059 (0.358)             | 0.057 (0.573)               | 0.064 (0.485)             |
| <i>I</i> / $\sigma$ <i>I</i>                            | 5.6 (1.6)                 | 9.1 (1.5)                   | 13.1 (1.7)                |
| Ellipsoidal completeness (%)                            | 89.4 (68.2)               | 84.9 (5.2)                  | 91.6 (92.3)               |
| Redundancy                                              | 3.8 (3.8)                 | 10.7 (11.0)                 | 13.9 (12.8)               |
| <b>Refinement</b>                                       |                           |                             |                           |
| Resolution (Å)                                          | 96-3.04                   |                             |                           |
| No. reflections                                         | 75499 (3733)              |                             |                           |
| <i>R</i> <sub>work</sub> / <i>R</i> <sub>free</sub> (%) | 20.24/23.30               |                             |                           |
| No. atoms                                               |                           |                             |                           |
| Protein                                                 | 34901                     |                             |                           |
| Ligand/ion                                              | 0                         |                             |                           |
| Water                                                   | 0                         |                             |                           |
| <i>B</i> -factors (Å <sup>2</sup> )                     |                           |                             |                           |
| Protein                                                 | 104.8                     |                             |                           |
| Ligand/ion                                              | -                         |                             |                           |
| Water                                                   | -                         |                             |                           |
| R.m.s. deviations                                       |                           |                             |                           |
| Bond lengths (Å)                                        | 0.006                     |                             |                           |
| Bond angles (°)                                         | 0.85                      |                             |                           |

**Supplementary Table 2 – Cryo-EM data collection, refinement and validation statistics**

|                                                  | Class 1<br>(EMDB-12318)<br>(PDB 7NH1) | Class 2<br>(EMDB-12319)<br>(PDB 7NH3) |
|--------------------------------------------------|---------------------------------------|---------------------------------------|
| <b>Data collection and processing</b>            |                                       |                                       |
| Magnification                                    | 105,000x                              | 105,000x                              |
| Voltage (kV)                                     | 300                                   | 300                                   |
| Electron exposure (e-/Å <sup>2</sup> )           | 60.4                                  | 60.4                                  |
| Defocus range (µm)                               | -2 to -3.5                            | -2 to -3.5                            |
| Pixel size (Å)                                   | 0.86                                  | 0.86                                  |
| Symmetry imposed                                 | C1                                    | C1                                    |
| Initial particle images (no.)                    | 766368                                | 766368                                |
| Final particle images (no.)                      | 56284                                 | 57866                                 |
| Map resolution (Å)                               | 5.29                                  | 6.37                                  |
| FSC threshold                                    | 0.143                                 | 0.143                                 |
| Map resolution range (Å)                         | 4.7-8.8                               | 4.7-8.8                               |
| <b>Refinement</b>                                |                                       |                                       |
| Initial model used (PDB code)                    | 7BII                                  | 7BII                                  |
| Model resolution (Å)                             | 7.4                                   | 8.1                                   |
| FSC threshold                                    | 0.5                                   | 0.5                                   |
| Model resolution range (Å)                       |                                       |                                       |
| Map sharpening <i>B</i> factor (Å <sup>2</sup> ) | -137                                  | -178                                  |
| Model composition                                |                                       |                                       |
| Non-hydrogen atoms                               | 17417                                 | 17417                                 |
| Protein residues                                 | 2138                                  | 2138                                  |
| Ligands                                          | 0                                     | 0                                     |
| <i>B</i> factors (Å <sup>2</sup> )               |                                       |                                       |
| Protein                                          | 488                                   | 563                                   |
| Ligand                                           | -                                     | -                                     |
| R.m.s. deviations                                |                                       |                                       |
| Bond lengths (Å)                                 | 0.003                                 | 0.003                                 |
| Bond angles (°)                                  | 0.639                                 | 0.654                                 |
| Validation                                       |                                       |                                       |
| MolProbity score                                 | 1.99                                  | 2.02                                  |
| Clashscore                                       | 15.58                                 | 16.86                                 |
| Poor rotamers (%)                                | 0                                     | 0                                     |
| Ramachandran plot                                |                                       |                                       |
| Favored (%)                                      | 95.7                                  | 95.8                                  |
| Allowed (%)                                      | 4.23                                  | 4.24                                  |
| Disallowed (%)                                   | 0.05                                  | 0                                     |

## Supplementary Figures

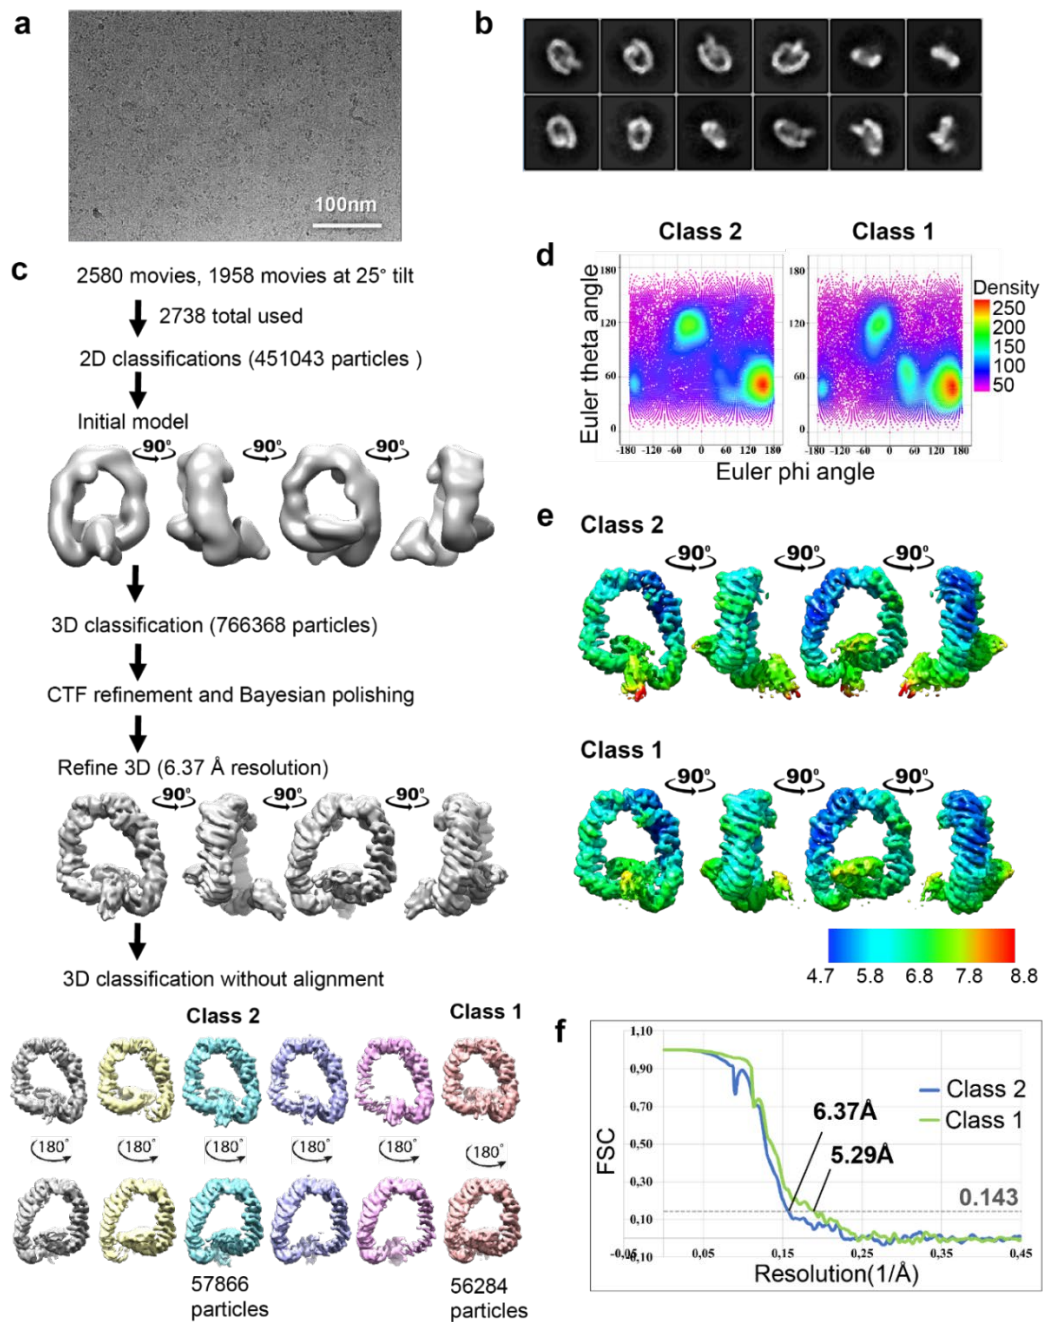

**Supplementary Figure 1 – CryoEM data processing workflow.** (a) Representative summed micrograph from 2738 total used micrographs. (b) 2D classification results showing different views (c) Processing workflow. (d-f) The Euler angle distribution (d), local resolution maps (e), and Fourier shell correlation curves (f) for Class 1 and Class 2.
